# Supplementary material for: Evaluation of Biofilm Production and Antifungal Susceptibility to Fluconazole in Clinical Isolates of Candida spp. in Both Planktonic and Biofilm Form
Source: MDPI journal article supplement (doi:10.3390/microorganisms12010153), 2024-01-12
Supplement: s1 [file s1]

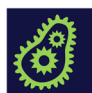

## Supplementary material

**Table S1:** The following table contains all the information acquired during the work to perform the statistical analysis of the data. It includes the PMIC and MBEC<sub>50</sub> values for each individual *Candida* strain, from which susceptibility could be assessed according to the EUCAST reference breakpoints [15]. For each strain, the respective category of low, medium and high biofilm producer and low, medium and high metabolic activity, evaluated according to tertile analysis, is also given.

| N. | Strain                  | Material       | PMIC<br>(mg/l) | MBEC <sub>50</sub><br>(mg/l) | PMIC<br>BP | MBEC <sub>50</sub><br>BP | CV Category | AB Category |
|----|-------------------------|----------------|----------------|------------------------------|------------|--------------------------|-------------|-------------|
| 1  | <i>Candida albicans</i> | Blood          | 0,5            | 16                           | S          | R                        | LBF         | MMA         |
| 2  | <i>Candida albicans</i> | Blood          | <=0.12         | 16                           | S          | R                        | LBF         | MMA         |
| 3  | <i>Candida albicans</i> | Blood          | 0,25           | 0,25                         | S          | S                        | LBF         | LMA         |
| 4  | <i>Candida albicans</i> | Blood          | 0,25           | 16                           | S          | R                        | LBF         | LMA         |
| 5  | <i>Candida albicans</i> | Blood          | 0,25           | 0,25                         | S          | S                        | LBF         | LMA         |
| 6  | <i>Candida albicans</i> | Blood          | <=0,012        | 0,03                         | S          | S                        | HBF         | MMA         |
| 7  | <i>Candida albicans</i> | Blood          | 0,25           | 16                           | S          | R                        | HBF         | HMA         |
| 8  | <i>Candida albicans</i> | Blood          | 0,25           | 16                           | S          | R                        | HBF         | HMA         |
| 9  | <i>Candida albicans</i> | Blood          | 0,06           | 0,06                         | S          | S                        | HBF         | HMA         |
| 10 | <i>Candida albicans</i> | Blood          | 0,5            | 16                           | S          | R                        | HBF         | HMA         |
| 11 | <i>Candida albicans</i> | Blood          | 0,25           | 16                           | S          | R                        | HBF         | HMA         |
| 12 | <i>Candida albicans</i> | Blood          | 0,5            | 16                           | S          | R                        | MBF         | MMA         |
| 13 | <i>Candida albicans</i> | Blood          | 0,25           | 16                           | S          | R                        | MBF         | HMA         |
| 14 | <i>Candida albicans</i> | Blood          | 0,25           | 16                           | S          | R                        | HBF         | HMA         |
| 15 | <i>Candida albicans</i> | Blood          | 0,25           | 1                            | S          | S                        | MBF         | HMA         |
| 16 | <i>Candida albicans</i> | Blood          | 0,25           | 0,5                          | S          | S                        | HBF         | MMA         |
| 17 | <i>Candida albicans</i> | Blood          | 0,25           | 16                           | S          | R                        | HBF         | MMA         |
| 18 | <i>Candida albicans</i> | Blood          | 0,25           | 8                            | S          | R                        | HBF         | HMA         |
| 19 | <i>Candida albicans</i> | Blood          | 0,25           | 16                           | S          | R                        | MBF         | HMA         |
| 20 | <i>Candida albicans</i> | Blood          | 0,25           | 16                           | S          | R                        | HBF         | MMA         |
| 21 | <i>Candida albicans</i> | Blood          | 0,25           | 16                           | S          | R                        | HBF         | MMA         |
| 22 | <i>Candida albicans</i> | Other material | 0,25           | 16                           | S          | R                        | MBF         | LMA         |
| 23 | <i>Candida albicans</i> | Other material | 0,5            | 8                            | S          | R                        | MBF         | LMA         |
| 24 | <i>Candida albicans</i> | Other material | 0,25           | 16                           | S          | R                        | MBF         | LMA         |
| 25 | <i>Candida albicans</i> | Other material | 0,25           | 16                           | S          | R                        | HBF         | MMA         |
| 26 | <i>Candida albicans</i> | Other material | 0,25           | 2                            | S          | S                        | HBF         | LMA         |
| 27 | <i>Candida albicans</i> | Other material | 0,25           | 16                           | S          | R                        | HBF         | MMA         |
| 28 | <i>Candida albicans</i> | Other material | 0,5            | 16                           | S          | R                        | MBF         | MMA         |
| 29 | <i>Candida albicans</i> | Other material | 0,25           | 1                            | S          | S                        | MBF         | LMA         |

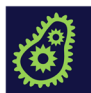

|    |                             |                |        |      |   |   |     |     |
|----|-----------------------------|----------------|--------|------|---|---|-----|-----|
| 30 | <i>Candida albicans</i>     | Other material | 0,25   | 16   | S | R | HBF | HMA |
| 31 | <i>Candida albicans</i>     | Other material | 0,25   | 8    | S | R | HBF | HMA |
| 32 | <i>Candida albicans</i>     | Other material | 0,25   | 8    | S | R | HBF | MMA |
| 33 | <i>Candida albicans</i>     | Other material | 0,25   | 0,25 | S | S | MBF | LMA |
| 34 | <i>Candida albicans</i>     | Other material | 0,25   | 16   | S | R | MBF | MMA |
| 35 | <i>Candida albicans</i>     | Other material | 0,5    | 16   | S | R | MBF | MMA |
| 36 | <i>Candida albicans</i>     | Other material | 0,25   | 16   | S | R | MBF | HMA |
| 37 | <i>Candida albicans</i>     | Other material | 0,25   | 16   | S | R | MBF | HMA |
| 38 | <i>Candida albicans</i>     | Other material | 0,25   | 16   | S | R | HBF | HMA |
| 39 | <i>Candida glabrata</i>     | Blood          | 16     | 16   | I | R | MBF | MMA |
| 40 | <i>Candida glabrata</i>     | Blood          | 8      | 8    | I | I | LBF | HMA |
| 41 | <i>Candida glabrata</i>     | Blood          | 32     | 16   | R | R | LBF | HMA |
| 42 | <i>Candida glabrata</i>     | Blood          | 16     | 16   | I | R | LBF | HMA |
| 43 | <i>Candida glabrata</i>     | Blood          | 32     | 16   | R | R | LBF | HMA |
| 44 | <i>Candida glabrata</i>     | Blood          | 2      | 16   | I | R | LBF | LMA |
| 45 | <i>Candida glabrata</i>     | Blood          | 0,5    | 16   | I | R | MBF | LMA |
| 46 | <i>Candida glabrata</i>     | Blood          | 16     | 16   | I | R | LBF | LMA |
| 47 | <i>Candida glabrata</i>     | Blood          | 0,5    | 8    | I | I | LBF | LMA |
| 48 | <i>Candida glabrata</i>     | Other material | 32     | 16   | R | R | LBF | LMA |
| 49 | <i>Candida glabrata</i>     | Other material | 8      | 16   | I | R | MBF | LMA |
| 50 | <i>Candida parapsilosis</i> | Blood          | 64     | 16   | R | R | MBF | MMA |
| 51 | <i>Candida parapsilosis</i> | Blood          | 0,5    | 8    | S | R | LBF | LMA |
| 52 | <i>Candida parapsilosis</i> | Blood          | <=0.12 | 1    | S | S | LBF | LMA |
| 53 | <i>Candida parapsilosis</i> | Blood          | 0,25   | 16   | S | R | MBF | MMA |
| 54 | <i>Candida parapsilosis</i> | Blood          | 32     | 16   | R | R | MBF | HMA |
| 55 | <i>Candida parapsilosis</i> | Blood          | 0,5    | 0,5  | S | S | LBF | HMA |
| 56 | <i>Candida parapsilosis</i> | Blood          | 0,25   | 8    | S | R | LBF | LMA |
| 57 | <i>Candida parapsilosis</i> | Blood          | 0,5    | 16   | S | R | HBF | HMA |
| 58 | <i>Candida parapsilosis</i> | Blood          | 32     | 16   | R | R | MBF | MMA |
| 59 | <i>Candida parapsilosis</i> | Blood          | 32     | 16   | R | R | MBF | HMA |
| 60 | <i>Candida parapsilosis</i> | Blood          | 0,5    | 1    | S | S | HBF | LMA |
| 61 | <i>Candida parapsilosis</i> | Blood          | 32     | 16   | R | R | HBF | LMA |
| 62 | <i>Candida parapsilosis</i> | Blood          | 1      | 16   | S | R | LBF | MMA |
| 63 | <i>Candida parapsilosis</i> | Blood          | 64     | 16   | R | R | LBF | MMA |
| 64 | <i>Candida parapsilosis</i> | Blood          | 32     | 16   | R | R | LBF | LMA |
| 65 | <i>Candida parapsilosis</i> | Blood          | 0,5    | 16   | S | R | MBF | HMA |
| 66 | <i>Candida parapsilosis</i> | Blood          | 32     | 16   | R | R | LBF | HMA |
| 67 | <i>Candida parapsilosis</i> | Blood          | 32     | 16   | R | R | LBF | HMA |
| 68 | <i>Candida parapsilosis</i> | Blood          | 1      | 8    | S | R | MBF | LMA |
| 69 | <i>Candida parapsilosis</i> | Blood          | 0,25   | 16   | S | R | LBF | LMA |

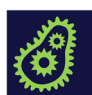

|    |                             |                |     |    |   |   |     |     |
|----|-----------------------------|----------------|-----|----|---|---|-----|-----|
| 70 | <i>Candida parapsilosis</i> | Blood          | 0,5 | 2  | S | S | LBF | LMA |
| 71 | <i>Candida parapsilosis</i> | Blood          | 32  | 16 | R | R | LBF | LMA |
| 72 | <i>Candida parapsilosis</i> | Blood          | 64  | 16 | R | R | LBF | HMA |
| 73 | <i>Candida parapsilosis</i> | Other material | 2   | 2  | S | S | LBF | LMA |
| 74 | <i>Candida parapsilosis</i> | Other material | 16  | 16 | S | R | LBF | LMA |
| 75 | <i>Candida parapsilosis</i> | Other material | 2   | 2  | S | S | MBF | LMA |
| 76 | <i>Candida tropicalis</i>   | Blood          | 1   | 16 | S | R | MBF | MMA |
| 77 | <i>Candida tropicalis</i>   | Blood          | 0,5 | 16 | S | R | HBF | MMA |
| 78 | <i>Candida tropicalis</i>   | Blood          | 2   | 2  | S | S | HBF | MMA |
| 79 | <i>Candida tropicalis</i>   | Blood          | 16  | 16 | R | R | MBF | HMA |
| 80 | <i>Candida tropicalis</i>   | Blood          | 64  | 16 | R | R | HBF | MMA |
| 81 | <i>Candida tropicalis</i>   | Blood          | 1   | 16 | S | R | HBF | MMA |
| 82 | <i>Candida tropicalis</i>   | Other material | 1   | 16 | S | R | HBF | MMA |
| 83 | <i>Candida tropicalis</i>   | Other material | 4   | 16 | R | R | HBF | MMA |

PMIC: minimum inhibitory concentration of the planktonic form.

MBEC<sub>50</sub>: minimum concentration of 50% eradication of the biofilm.

PMIC and MBEC<sub>50</sub> BP: breackpoint as susceptible (S), susceptible, increased exposure (I) and resistant (R), according EUCAST breakpoints [15].

CV category: *Candida* strains with low (LBF), moderate (MBF), and high (HBF) biofilm-forming capabilities.

AB category: *Candida* strains with low (LMA), moderate (MMA), and high (HMA) metabolic activities.

**Table S2:** The increase in resistance by moving from PMIC to MBEC<sub>50</sub> can be seen in the table. For statistical analysis, each *Candida* species analyzed was divided according to LBF, MBF, and HBF categories and according to the degree of susceptibility (S, I, R), based on the respective reference breakpoints listed by EUCAST [15].

PMIC: minimum inhibitory concentration of the planktonic form; MBEC<sub>50</sub>: minimum 50% eradication concentration of the biofilm; S: susceptible; I: susceptible, increased exposure; R: resistant.

| Spieces                  |   | Blood |     |     | Other materials |     |     | Blood (%) |      |      | Other materials (%) |      |      |
|--------------------------|---|-------|-----|-----|-----------------|-----|-----|-----------|------|------|---------------------|------|------|
| <i>Candida albicans</i>  |   | LBF   | MBF | HBF | LBF             | MBF | HBF | LBF       | MBF  | HBF  | LBF                 | MBF  | HBF  |
| <i>PMIC</i>              | S | 5     | 4   | 12  | 0               | 10  | 7   | 100%      | 100% | 100% | 0%                  | 100% | 100% |
|                          | R | 0     | 0   | 0   | 0               | 0   | 0   | 0%        | 0%   | 0%   | 0%                  | 0%   | 0%   |
| <i>MBEC<sub>50</sub></i> | S | 2     | 1   | 3   | 0               | 2   | 1   | 40%       | 25%  | 25%  | 0%                  | 20%  | 14%  |
|                          | R | 3     | 3   | 9   | 0               | 8   | 6   | 60%       | 75%  | 75%  | 0%                  | 80%  | 86%  |
| Total                    |   | 5     | 4   | 12  | 0               | 10  | 7   | 60%       | 75%  | 75%  | /                   | 80%  | 86%  |

| Spieces | Blood |  |  | Other materials |  |  | Blood (%) |  |  | Other materials (%) |  |  |
|---------|-------|--|--|-----------------|--|--|-----------|--|--|---------------------|--|--|
|---------|-------|--|--|-----------------|--|--|-----------|--|--|---------------------|--|--|

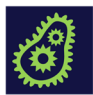

| <i>Candida parapsilosis</i> |   | LBF | MBF | HBF | LBF | MBF | HBF | LBF | MBF  | HBF | LBF  | MBF  | HBF |
|-----------------------------|---|-----|-----|-----|-----|-----|-----|-----|------|-----|------|------|-----|
| PMIC                        | S | 7   | 3   | 2   | 2   | 1   | 0   | 54% | 43%  | 67% | 100% | 100% | 0%  |
|                             | R | 6   | 4   | 1   | 0   | 0   | 0   | 46% | 57%  | 33% | 0%   | 0%   | 0%  |
| MBEC <sub>50</sub>          | S | 3   | 0   | 1   | 1   | 1   | 0   | 23% | 0%   | 33% | 50%  | 100% | 0%  |
|                             | R | 10  | 7   | 2   | 1   | 0   | 0   | 77% | 100% | 67% | 50%  | 0%   | 0%  |
| Total                       |   | 13  | 7   | 3   | 2   | 1   | 0   | 31% | 43%  | 33% | 50%  | 0%   | /   |

| Spieces                 |   | Blood |     |     | Other materials |     |     | Blood (%) |      |     | Other materials (%) |      |     |
|-------------------------|---|-------|-----|-----|-----------------|-----|-----|-----------|------|-----|---------------------|------|-----|
| <i>Candida glabrata</i> |   | LBF   | MBF | HBF | LBF             | MBF | HBF | LBF       | MBF  | HBF | LBF                 | MBF  | HBF |
| PMIC                    | S | 0     | 0   | 0   | 0               | 0   | 0   | 0%        | 0%   | 0%  | 0%                  | 0%   | 0%  |
|                         | I | 5     | 2   | 0   | 0               | 1   | 0   | 71%       | 100% | 0%  | 0%                  | 100% | 0%  |
|                         | R | 2     | 0   | 0   | 1               | 0   | 0   | 29%       | 0%   | 0%  | 100%                | 0%   | 0%  |
| MBEC <sub>50</sub>      | S | 0     | 0   | 0   | 0               | 0   | 0   | 0%        | 0%   | 0%  | 0%                  | 0%   | 0%  |
|                         | I | 2     | 0   | 0   | 0               | 0   | 0   | 29%       | 0%   | 0%  | 0%                  | 0%   | 0%  |
|                         | R | 5     | 2   | 0   | 1               | 1   | 0   | 71%       | 100% | 0%  | 100%                | 100% | 0%  |
| Total                   |   | 7     | 2   | 0   | 1               | 1   | 0   | 43%       | 100% | /   | 0%                  | 100% | /   |

| Spieces                   |   | Blood |     |     | Other materials |     |     | Blood (%) |      |     | Other materials (%) |     |      |
|---------------------------|---|-------|-----|-----|-----------------|-----|-----|-----------|------|-----|---------------------|-----|------|
| <i>Candida tropicalis</i> |   | LBF   | MBF | HBF | LBF             | MBF | HBF | LBF       | MBF  | HBF | LBF                 | MBF | HBF  |
| PMIC                      | S | 0     | 1   | 3   | 0               | 0   | 1   | 0%        | 50%  | 75% | 0%                  | 0%  | 50%  |
|                           | R | 0     | 1   | 1   | 0               | 0   | 1   | 0%        | 50%  | 25% | 0%                  | 0%  | 50%  |
| MBEC <sub>50</sub>        | S | 0     | 0   | 1   | 0               | 0   | 0   | 0%        | 0%   | 25% | 0%                  | 0%  | 0%   |
|                           | R | 0     | 2   | 3   | 0               | 0   | 2   | 0%        | 100% | 75% | 0%                  | 0%  | 100% |
| Total                     |   | 0     | 2   | 4   | 0               | 0   | 2   | /         | 50%  | 50% | /                   | /   | 50%  |
